# Supplementary material for: Elucidation of glutamine lipid biosynthesis in marine bacteria reveals its importance under phosphorus deplete growth in Rhodobacteraceae
Source: PubMed Central journal article supplement (PMC6298996; doi:10.1038/s41396-018-0249-z), 2018-08-14

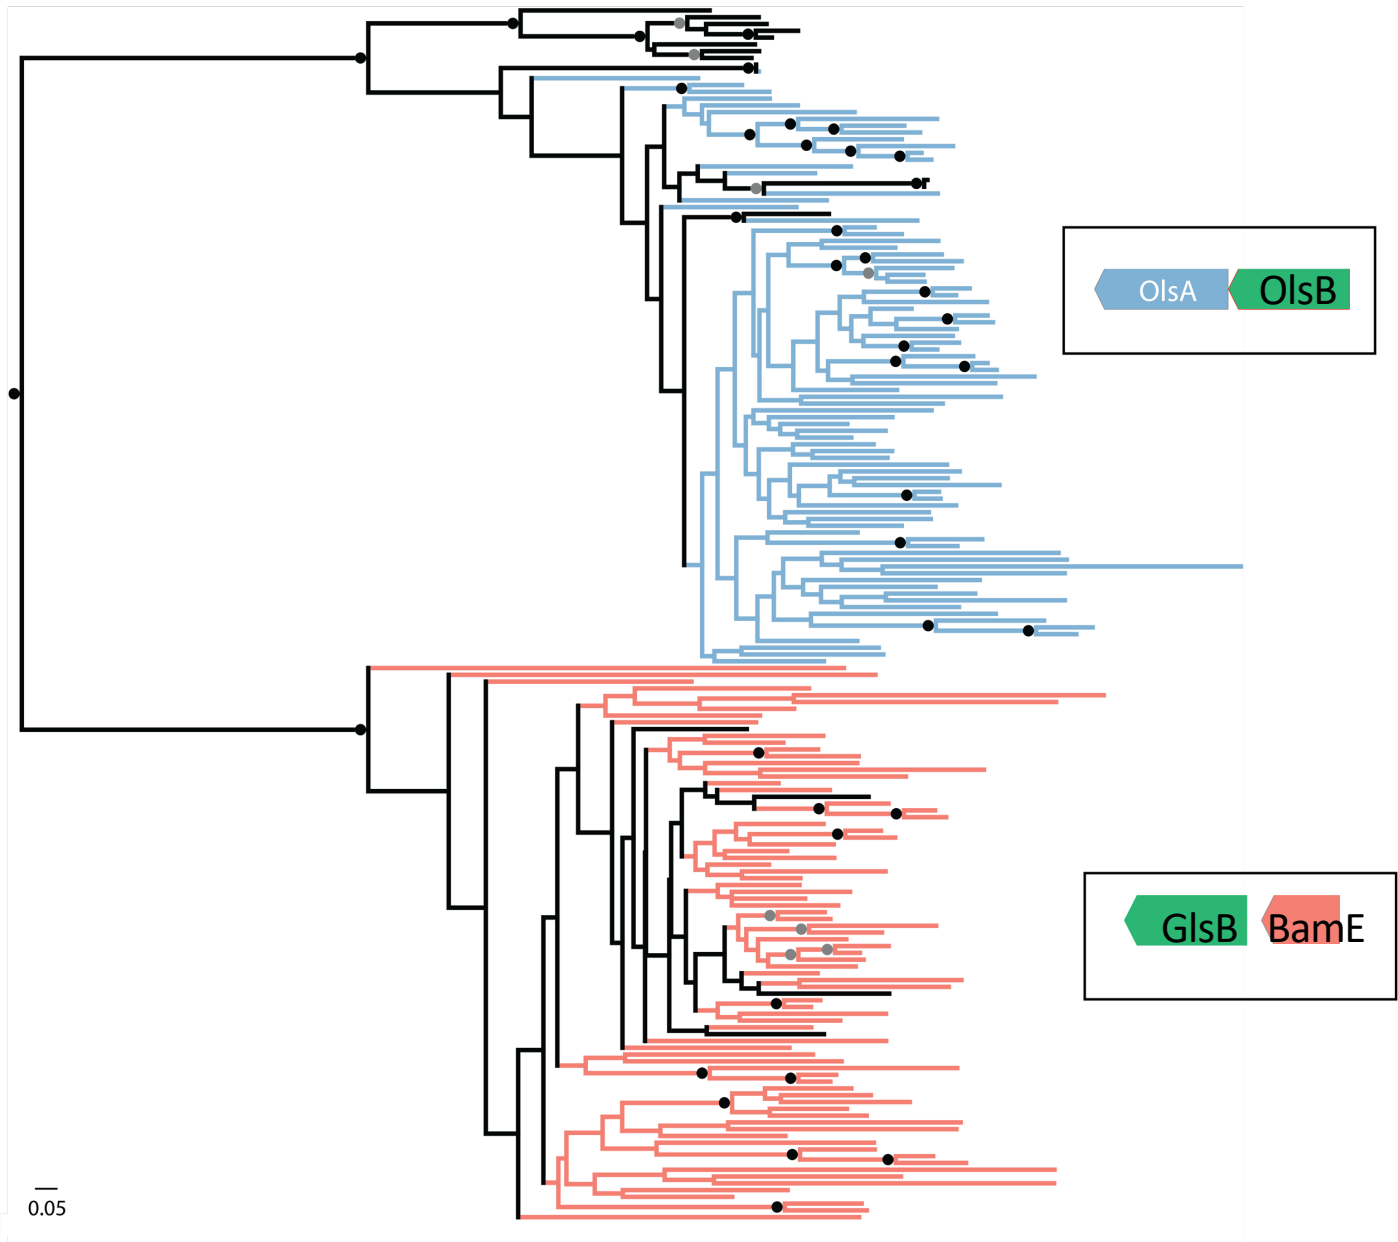

Supplement: 41396_2018_249_MOESM6_ESM.pdf [file 41396_2018_249_MOESM6_ESM.pdf]
